# Supplementary material for: The Core-Targeted RRM2 Gene of Berberine Hydrochloride Promotes Breast Cancer Cell Migration and Invasion via the Epithelial–Mesenchymal Transition
Source: MDPI journal article supplement (doi:10.3390/ph16010042), 2022-12-28
Supplement: s1 [file s1]

**Table S1. Antibodies used in the experiments.**

| Antibody   | Source                         | No. of<br>Catalogue | Dilution |       |        |
|------------|--------------------------------|---------------------|----------|-------|--------|
|            |                                |                     | WB       | IHC   | IF     |
| HIF-1α     | Cell Signaling Technology, USA | 79233               | 1:1000   |       |        |
| AMPKα1     | Cell Signaling Technology, USA | 2795                | 1:1000   |       |        |
| P-AMPKα1   | Cell Signaling Technology, USA | 2537                | 1:1000   |       |        |
| PI3K       | Cell Signaling Technology, USA | 4257                | 1:1000   |       |        |
| P-PI3K     | Cell Signaling Technology, USA | 17366               | 1:1000   |       |        |
| AKT        | Cell Signaling Technology, USA | 4691                | 1:1000   |       |        |
| P-AKT      | Cell Signaling Technology, USA | 4060                | 1:1000   |       |        |
| S6K        | Cell Signaling Technology, USA | 9202                | 1:1000   |       |        |
| P-S6K      | Cell Signaling Technology, USA | 9234                | 1:1000   |       |        |
| E-cadherin | Cell Signaling Technology, USA | 14472               | 1:1000   |       | 1: 100 |
| N-cadherin | Abclonal, China                | A0433               | 1:1000   |       |        |
| Vimentin   | Abclonal, China                | A11952              | 1:1000   |       | 1: 200 |
| RRM2       | Abclonal, China                | 6241                | 1:1000   | 1: 50 |        |

Abbreviations: WB: Western blot; IHC: Immunohistochemistry; IF: Immunofluorescence
