# Supplementary material for: The Core-Targeted RRM2 Gene of Berberine Hydrochloride Promotes Breast Cancer Cell Migration and Invasion via the Epithelial–Mesenchymal Transition
Source: MDPI journal article supplement (doi:10.3390/ph16010042), 2022-12-28
Supplement: s1 [file s1]

**Table S2. Primers used in the experiments.**

| Gene name  |            | Primer sequence                | Application    |
|------------|------------|--------------------------------|----------------|
| RRM2       | F          | 5'-AGTGGAAGGCATTTTCTTTTCC-3'   | qRT-PCR        |
|            | R          | 5'-GCAAAATCACAGTGTAACCCT-3'    |                |
| E-Cadherin | F          | 5'-ATTTTCCCTCGACACCCGAT-3'     | qRT-PCR        |
|            | R          | 5'-TCCCAGGCGTAGACCAAGA-3'      |                |
| N-Cadherin | F          | 5'-TGCGGTACAGTGTAAGTGGG-3'     | qRT-PCR        |
|            | R          | 5'-GAAACCGGGCTATCTGCTCG-3'     |                |
| Vimentin   | F          | 5'-AGTCCACTGAGTACCGGAGAC-3'    | qRT-PCR        |
|            | R          | 5'-CATTTACGCATCTGGCGTTC-3'     |                |
| GAPDH      | F          | 5'-CAGGAGGCATTGCTGATGAT-3'     | qRT-PCR        |
|            | R          | 5'-GAAGGCTGGGGCTCATTT-3'       |                |
| si-NC      | sense      | 5'-UUCUCCGAACGUGUCACGUTT-3'    | si-RNA         |
|            | anti-sense | 5'-ACGUGACACGUUCGGAGAATT-3'    |                |
| si-RRM2#1  | sense      | 5'-CCAUCGAGUACCAUGAUUATT-3'    | si-RNA         |
|            | anti-sense | 5'-AUAUCAUGGUACUCGAUGGTT-3'    |                |
| si-RRM2#2  | sense      | 5'-GGAGCGAUUUAGCCAAGAATT-3'    | si-RNA         |
|            | anti-sense | 5'-UUCUUGGCUAAAUCGCUCCTT-3'    |                |
| MT1F       | F          | 5'-GAATGTAGCAAATGGGTCAAGGTG-3' | qRT-PCR (up)   |
|            | R          | 5'-TCTCCTGCACCTGCGCTGGT-3'     |                |
| CYP1A1     | F          | 5'-TCGGCCACGGAGTTTCTTC-3'      | qRT-PCR (up)   |
|            | R          | 5'-GGTCAGCATGTGCCAATCA-3'      |                |
| HMOX1      | F          | 5'-ATTTCAGAAGGGCCAGGTGA-3'     | qRT-PCR (up)   |
|            | R          | 5'-GGAAGTAGACAGGGGCGAAGA-3'    |                |
| AJUBA      | F          | 5'-GATGCGGGAGCCAGAGG-3'        | qRT-PCR (up)   |
|            | R          | 5'-CACAAGAGCAGCAAACAAAGC-3'    |                |
| IL6        | F          | 5'-GACCGAAGGCGCTTGTGGA-3'      | qRT-PCR (up)   |
|            | R          | 5'-CTCATTCTGCCCTCGAGCC-3'      |                |
| SLC7A11    | F          | 5'-TTACCAGCTTTTGTACGAGTCT-3'   | qRT-PCR (up)   |
|            | R          | 5'-GTGAGCTTGCAAAAGGTTAAGA-3'   |                |
| MKNK2      | F          | 5'-GTTCTGAAGATGTCTATCAGC-3'    | qRT-PCR (up)   |
|            | R          | 5'-TTCTAGAACATTCTATGTCCC-3'    |                |
| CYP1B1     | F          | 5'-CTCTCTGGAGAAATGGCCGA-3'     | qRT-PCR (up)   |
|            | R          | 5'-AAAGGAAATCAAGCGCCACC-3'     |                |
| FABP5      | F          | 5'-GCATTGGTTCAGCATCAG-3'       | qRT-PCR (up)   |
|            | R          | 5'-ATCCGAGTACAGGTGACA-3'       |                |
| CD55       | F          | 5'-TGACTGTGGCCTTCCCCCAGAT-3'   | qRT-PCR (up)   |
|            | R          | 5'-GTGTTACATGAGAAGGAGATGG-3'   |                |
| APLN       | F          | 5'-AAGGCACCATCCGATACCTG-3'     | qRT-PCR (down) |
|            | R          | 5'-ATGGGACCCTTGTGGGAGA-3'      |                |
| FADS2      | F          | 5'-TGGAGCAGTCCTTCTTCAACG-3'    | qRT-PCR (down) |
|            | R          | 5'-AGCCACAGCTTCCAGACTTC-3'     |                |
| ACSS2      | F          | 5'-GGATTCCAGCTGCAGTCTTC-3'     | qRT-PCR (down) |
|            | R          | 5'-CAGCCAGCTCCTTCAGGTT-3'      |                |

|       |   |                              |                |
|-------|---|------------------------------|----------------|
| CCL2  | F | 5'-CCGAGAGGCTGAGACTAACC-3'   | qRT-PCR (down) |
|       | R | 5'-CTTTCATGCTGGAGGCGAGA-3'   |                |
| STC1  | F | 5'-TTCTGGTGCTGGTGATCAGTG-3'  | qRT-PCR (down) |
|       | R | 5'-TTTGGGCACAGTGGTCTGTCT-3'  |                |
| NDRG1 | F | 5'-CTGCACCTGTTCATCAATGC-3'   | qRT-PCR (down) |
|       | R | 5'-AGAGAAAGTGACGCTGGAACC-3'  |                |
| SCD   | F | 5'-TCTAGCTCCTATACCACCACCA-3' | qRT-PCR (down) |
|       | R | 5'-TCGTCTCCAACTTATCTCCTCC-3' |                |
| LRP5  | F | 5'-AGGCCCTACATCATTGAGG-3'    | qRT-PCR (down) |
|       | R | 5'-GGGGTCTGAGTCCGAATTCA-3'   |                |
| EGR1  | F | 5'-CTGCGACATCTGTGGAAGAAA-3'  | qRT-PCR (down) |
|       | R | 5'-TGTCTGCTTTCTTGTCTTCTG-3'  |                |
| CD24  | F | 5'-CCAACTAATGCCACCACCA-3'    | qRT-PCR (down) |
|       | R | 5'-GACGTTTCTTGGCCTGAGTC-3'   |                |

Abbreviations: F: Forward; R: Reverse; qRT-PCR: quantitative real-time PCR; si-RNA: Small interfering-RNA;
